# Supplementary material for: Attenuation of Na/K-ATPase Mediated Oxidant Amplification with pNaKtide Ameliorates Experimental Uremic Cardiomyopathy
Source: PubMed Central journal article supplement (PMC5048179; doi:10.1038/srep34592), 2016-10-04
Supplement: srep34592-s1.pdf [file srep34592-s1.pdf]

**Attenuation of Na/K-ATPase Mediated Oxidant Amplification with pNaKtide  
Ameliorates Experimental Uremic Cardiomyopathy**

by

**Authors:** \*Jiang Liu<sup>1</sup>, \*Jiang Tian<sup>2</sup>, Muhammad Chaudhry<sup>1</sup>, Kyle Maxwell<sup>1</sup>, Yanling Yan<sup>1</sup>, Xiaoliang Wang<sup>1</sup>, Preeya T. Shah<sup>1</sup>, Asad A. Khawaja<sup>1</sup>, Rebecca Martin<sup>1</sup>, Tylor J. Robinette<sup>1</sup>, Adeel El-Hamdani<sup>1</sup>, Michael W. Dodrill<sup>1</sup>, Komal Sodhi<sup>1</sup>, Christopher A. Drummond<sup>2</sup>, Steven T. Haller<sup>2</sup>, David J. Kennedy<sup>2</sup>, Nader G. Abraham<sup>3,1</sup>, Zijian Xie<sup>1</sup>, and Joseph I. Shapiro<sup>1§</sup>

From

<sup>1</sup>Marshall University, <sup>2</sup>University of Toledo  
and <sup>3</sup>New York Medical College

**Corresponding Author:**

Joseph I. Shapiro, M.D.

Dean, Joan C. Edwards School of Medicine Professor of Medicine

Marshall University

1600 Medical Center Drive

Huntington, WV 25701-3655

Email: [shapiroj@marshall.edu](mailto:shapiroj@marshall.edu)

Phone: 304.691.1700

Fax: 304.691.1726

**Results:****Table S1: Blood Pressure Responses to PNx, CoPP and pNaktide.**

| Variable          | Sham<br>(n=18) | PNx<br>(n=21) | Sham+CoPP<br>(n=12) | PNx+CoPP<br>(n=15) | Sham+pNaktide<br>(n=13) | PNx+pNaktide<br>(n=14) |
|-------------------|----------------|---------------|---------------------|--------------------|-------------------------|------------------------|
| BASELINE, SBP     | 114.1±1.7      | 115.8±2.0     | 118.0±2.0           | 119.2±2.5          | 118.3±2.3               | 117.9±2.8              |
| BASELINE, DBP     | 86.3±1.3       | 89.0±1.4      | 90.0±1.2            | 87.4±1.5           | 89.0±1.6                | 87.8±1.4               |
| BASELINE, Mean BP | 106.0±1.7      | 105.6±1.4     | 106.6±0.9           | 105.9±0.9          | 102.6±1.3               | 104.3±1.1              |
| FINAL, SBP        | 118.2±1.9      | 119.2±1.5     | 116.0±1.6           | 116.1±2.1          | 118.6±2.1               | 114.6±1.4              |
| FINAL, DBP        | 89.2±2.0       | 91.5±1.8      | 88.2±1.6            | 87.1±1.4           | 87.4±2.1                | 87.6±1.5               |
| FINAL, Mean BP    | 107.4±1.8      | 107.2±3.0     | 103.8±1.0           | 105.6±1.2          | 101.6±2.6               | 106.7±1.3              |

BP measurements were performed with CODA 8-Channel High Throughput Non-Invasive Blood Pressure System (Kent Scientific, Boston, MA) both one day before step-one surgery, and one day before sacrifice. Mice were first conditioned in restrainers for at least five days prior to the first baseline and final BP reading. In each group, the baseline represented the baseline BP before sham or PNx surgery, and the final represented the final BP before sacrifice, 4 weeks after sham and PNx surgery (n=12-21 per group). SBP, systolic blood pressure; DBP, diastolic blood pressure; Mean BP, mean arterial pressure. Data presented as mean ± SEM.

**Figure S1: CoPP and pNaKtide did not alleviate PNx induced impairment of renal function.**

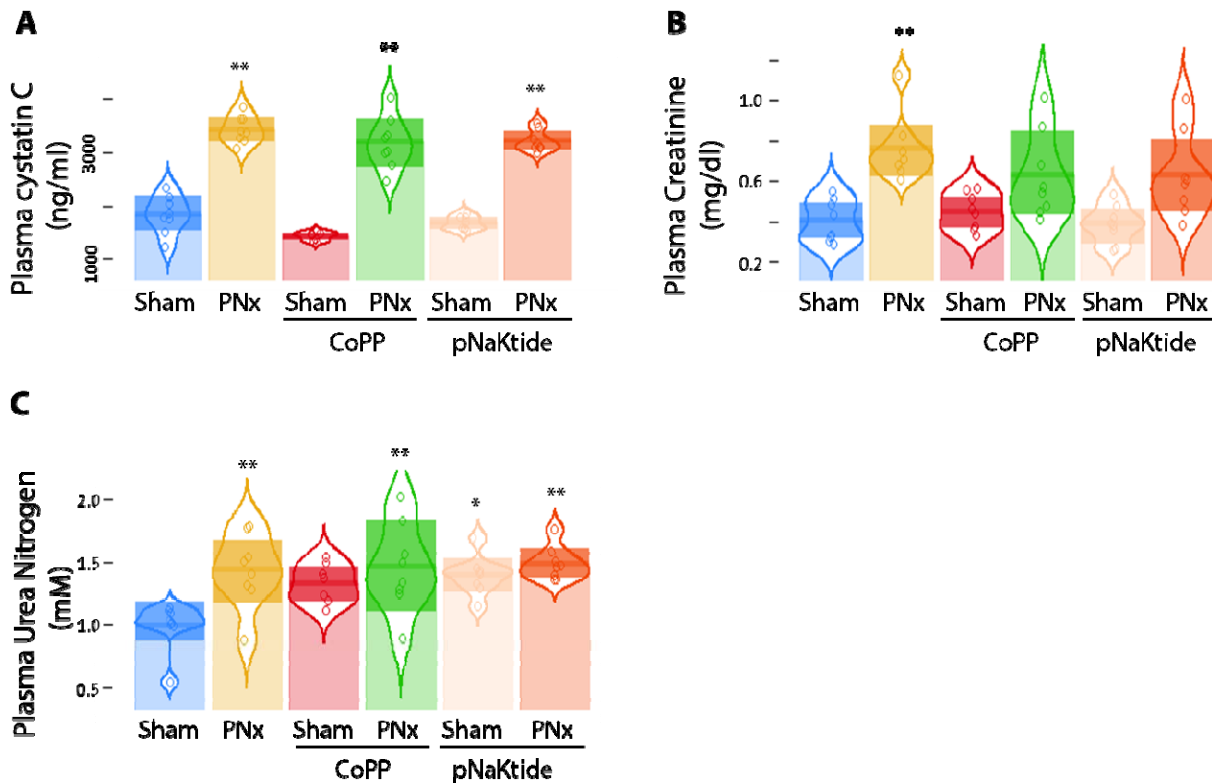

PNx induced impairment of renal function as assessed by plasma cystatin C (**A**), creatinine (**B**), and BUN (**C**), but neither CoPP nor pNaKtide effected significant changes in these measurements (n=7-8 per group). \*,  $p < 0.05$  vs. Sham; \*\*,  $p < 0.01$  vs. Sham. The Mouse cystatin C ELISA kit and creatinine kit were obtained from Crystal Chem. Inc. (Downers Grove, IL). The Mouse BUN ELISA kit was obtained from MyBioSource Inc (San Diego, CA). The measurements were performed following manufactures' instruction. Each sample was done in duplicate.

**Figure S2: Effect of CoPP and pNaKtide on cardiac oxidant stress:**

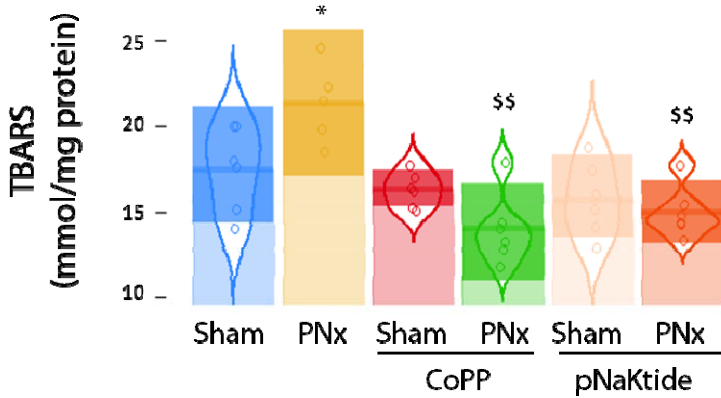

At 4 weeks after PNx surgery, a significant stimulation of lipid peroxidation assayed by Thiobarbituric Acid Reactive Substances (TBARS) was observed in left ventricle homogenates in the PNx group. Lipid peroxidation was attenuated in PNx animals treated with CoPP and pNaKtide (n=7-8 per group). \*,  $p < 0.05$  vs. Sham; §§,  $p < 0.01$  vs. PNx.

**Table S2: Effect of pNaKtide on Blood Pressure following 4 weeks after PNx.**

| Variable          | PNx vehicle<br>(n=21) | PNx+1mg/kg<br>(n=6) | PNx+5mg/kg<br>(n=14) | PNx+10mg/kg<br>(n=14) | PNx+25mg/kg<br>(n=7) |
|-------------------|-----------------------|---------------------|----------------------|-----------------------|----------------------|
| BASELINE, SBP     | 115.8±2.0             | 118.2±1.6           | 120.3±2.3            | 118.6±2.1             | 120.9±1.8            |
| BASELINE, DBP     | 89.0±1.4              | 88.8±1.4            | 89.1±1.5             | 90.1±1.4              | 89.5±1.8             |
| BASELINE, Mean BP | 105.6±1.4             | 104.0±1.5           | 102.8±0.7            | 106.4±1.3             | 104.4±0.9            |
| FINAL, SBP        | 119.2±1.5             | 114.9±2.2           | 117.7±1.9            | 117.6±2.0             | 119.0±1.8            |
| FINAL, DBP        | 91.5±1.8              | 85.6±0.4            | 88.6±1.3             | 85.3±1.1              | 87.3±1.3             |
| FINAL, Mean BP    | 107.2±3.0             | 94.1±2.0            | 106.0±1.3            | 101.1±0.6             | 103.6±1.1            |

In the Reversal study, in which pNaKtide was administered (3x/week for 1 week) to PNx mice 4 weeks after PNx surgery, BP readings were not affected by the different doses of pNaKtide. In each group, the baseline represented the baseline BP obtained 4 weeks after PNx surgery, and the final represented the final BP before sacrifice, obtained after one week of pNaKtide or vehicle injections, thus 5 weeks after sham and PNx surgery (n=6-14 per group). Systolic blood pressure (SBP); diastolic blood pressure (DBP); mean arterial pressure (Mean BP). Data presented as mean ± SEM.

**Figure S3: Effect of pNaKtide on renal function in reversal study:**

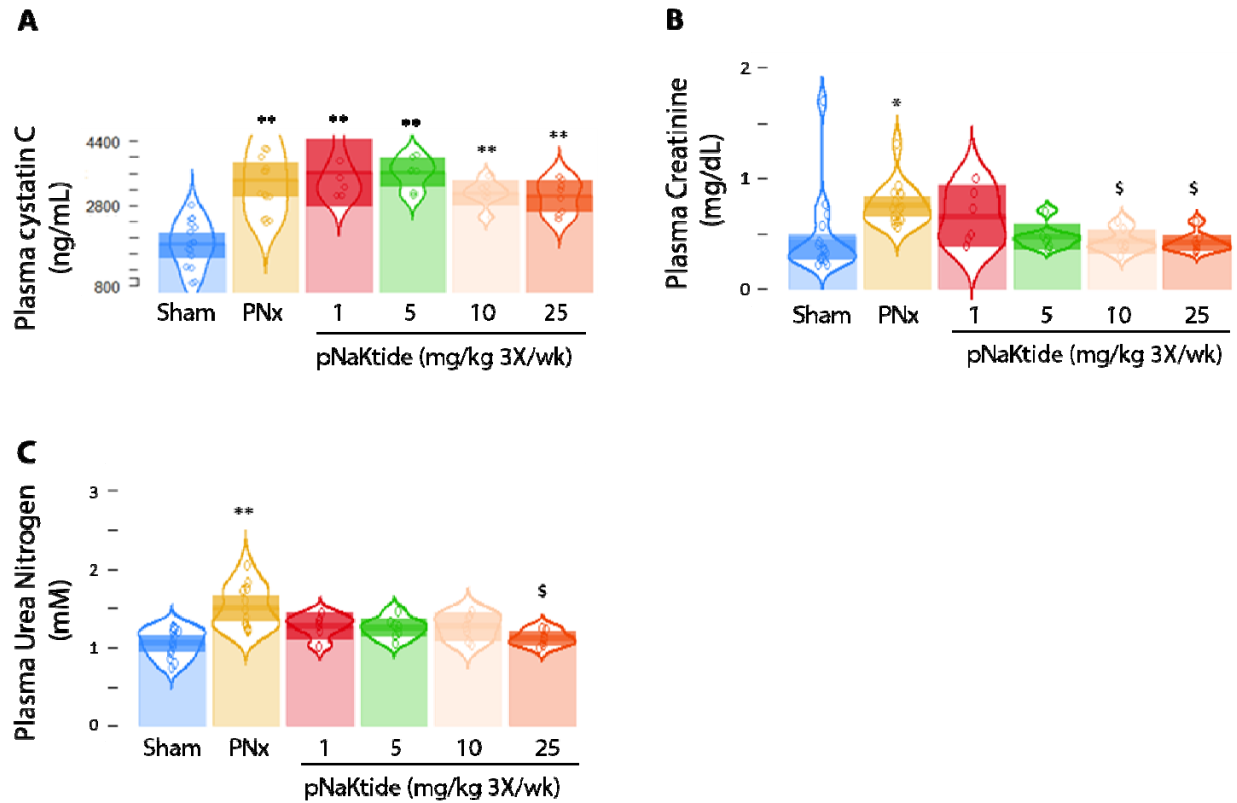

In the Reversal study, pNaKtide was administered (3x/week for 1 week) to PNx mice 4 weeks after PNx surgery. At higher dose(s), pNaKtide did not reduce PNx-induced cystatin C **(A)**, but pNaKtide reduced PNx-induced high plasma creatinine **(B)** and BUN **(C)**. n=6-8 mice per group. \*,  $p < 0.05$  vs. Sham; \*\*,  $p < 0.01$  vs. Sham; \$,  $p < 0.05$  vs. PNx.

**Figure S4: pNaKtide distribution in mouse cardiac fibroblasts primary culture as well as heart, kidney, and visceral adipose of C57BL/6 mice.**

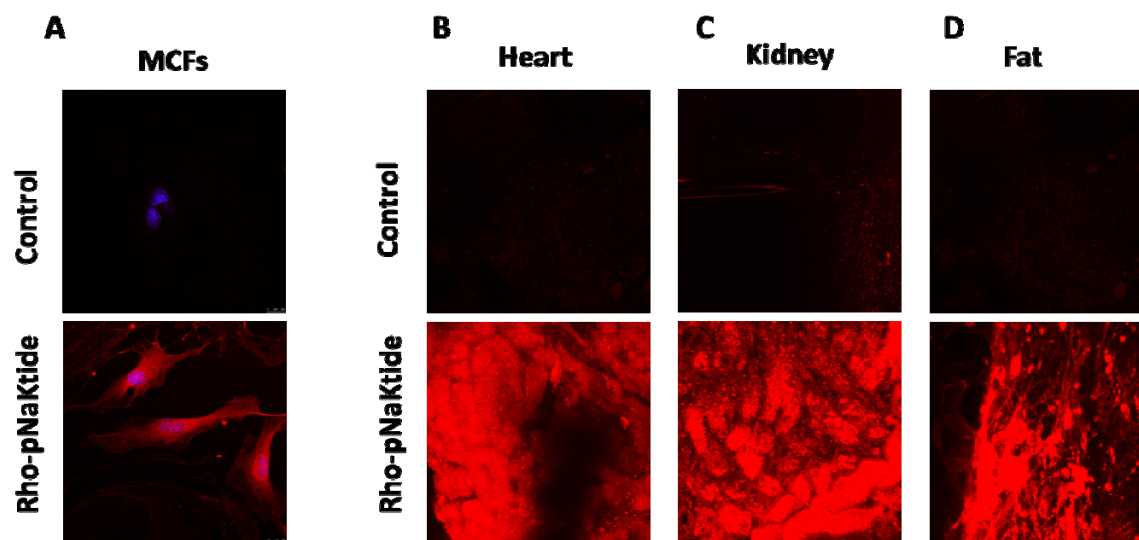

**(A)** Mouse cardiac fibroblasts were incubated with 1  $\mu$ M of rhodamine-labeled pNaKtide (Rho-pNaKtide) for 1 hour. Fixed cells were mounted with mounting medium with DAPI (Vector laboratory) (n=4). **(B-D)** Rho-pNaKtide (25mg/kg BW) was administrated to mice by i.p. injection. Vehicle of the same volume was administrated in control mice. After 3 hours, fresh organs (**B** heart, **C** kidney, and **D** visceral adipose) were rinsed with cold 1x PBS, sectioned with surgical blades, and rinsed with cold 1xPBS again. Images were obtained with a 25X water-immersion objective (n=4).

**Figure S5.** Description of “pirate” plot showing the actual data points as circles, a density distribution of the data as a bean shape or pirate’s “beard”, the mean as a solid line with the 95% confidence interval for the mean shown as bands about the mean.

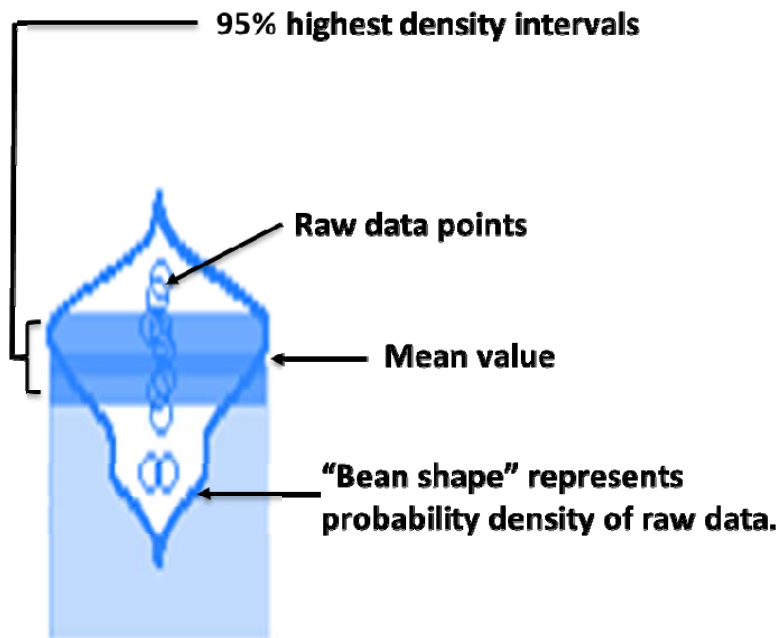



**Table S3: Abbreviations used.**


---

|              |                                                                           |
|--------------|---------------------------------------------------------------------------|
| AWT,         | anterior wall thickness                                                   |
| BP,          | blood pressure                                                            |
| BUN,         | blood urea nitrogen                                                       |
| CO,          | cardiac output                                                            |
| CoPP,        | cobalt protoporphyrin                                                     |
| c-Src,       | cellular tyrosine-protein kinase Src                                      |
| CTS,         | cardiotonic steroids                                                      |
| ECG,         | electrocardiogram                                                         |
| EDA,         | left-ventricular end-diastolic area                                       |
| EDD,         | end-diastolic diameter                                                    |
| ERK1/2,      | extracellular signal-regulated kinases 1 and 2                            |
| ESA,         | end-systolic area                                                         |
| ESD,         | end-systolic diameter                                                     |
| ET,          | ejection time                                                             |
| HO-1,        | heme oxygenase-1 (EC 1.14.99.3)                                           |
| HR,          | heart rate                                                                |
| IVCT,        | isovolumic contraction                                                    |
| IVRT,        | isovolumic relaxation time                                                |
| LV,          | left ventricle                                                            |
| LVMI,        | left ventricular mass index                                               |
| MPI,         | myocardial performance index                                              |
| Na/K-ATPase, | sodium-potassium adenosine triphosphatase (EC 3.6.3.9)                    |
| pNaKtide,    | a designed peptide derived from the $\alpha$ 1 subunit of the Na/K-ATPase |
| PNx,         | 5/6 partial nephrectomy                                                   |
| PWT,         | posterior wall thickness                                                  |
| ROS,         | reactive oxygen species                                                   |
| RWT,         | relative wall thickness                                                   |
| TBARS,       | thiobarbituric acid reactive substances                                   |
| TCB,         | telecinobufagin, one of cardiotonic steroids                              |
| VTI,         | pulmonary velocity time integral                                          |

---
